1 PheWAS-based clustering of Mendelian Randomisation  
2 instruments reveals distinct mechanism-specific causal effects  
3 between obesity and educational attainment

4 Liza Darrous<sup>1,2,3,†</sup>, Gibran Hemani<sup>4,5</sup>, George Davey Smith<sup>4,5</sup>, and Zoltán Kutalik<sup>1,2,3,†</sup>

5 <sup>1</sup>University Center for Primary Care and Public Health, University of Lausanne, Switzerland

6 <sup>2</sup>Swiss Institute of Bioinformatics, Lausanne, Switzerland

7 <sup>3</sup>Department of Computational Biology, University of Lausanne, Lausanne, Switzerland

8 <sup>4</sup>Medical Research Council Integrative Epidemiology Unit, Population Health Sciences, University of  
9 Bristol, Bristol, United Kingdom

10 <sup>5</sup>Population Health Sciences, Bristol Medical School, University of Bristol, Bristol, United Kingdom

11 <sup>†</sup>Correspondence should be addressed to [darrous.liza@gmail.com](mailto:darrous.liza@gmail.com) or [zoltan.kutalik@unil.ch](mailto:zoltan.kutalik@unil.ch)

12 **Abstract**

13 Mendelian Randomisation (MR) is a statistical method that estimates causal effects be-  
14 tween risk factors and common complex diseases using genetic instruments. Heritable con-  
15 founders, pleiotropy and heterogeneous causal effects violate MR assumptions and can lead  
16 to biases. To tackle these, we propose an approach employing a PheWAS-based clustering  
17 of the MR instruments (PWC-MR). We apply this method to revisit the surprisingly large  
18 apparent causal effect of body mass index (BMI) on educational attainment (EDU):  $\hat{\alpha} =$   
19  $-0.19$   $[-0.22, -0.16]$ .

20 As a first step of PWC-MR, we clustered 324 BMI-associated genetic instruments based  
21 on their association profile across 407 traits in the UK Biobank, which yielded six distinct  
22 groups. The subsequent cluster-specific MR revealed heterogeneous causal effect estimates  
23 on EDU. A cluster strongly enriched for traits related to socio-economic position yielded  
24 the largest BMI-on-EDU causal effect estimate ( $\hat{\alpha} = -0.49$   $[-0.56, -0.42]$ ) whereas a cluster  
25 enriched for primary impact on body-mass had the smallest estimate ( $\hat{\alpha} = -0.09$   $[-0.13, -$   
26  $0.05]$ ). Several follow-up analyses confirmed these findings: (i) within-sibling MR results ( $\hat{\alpha}$   
27  $= -0.05$   $[-0.09, -0.01]$ ); (ii) MR for childhood BMI on EDU ( $\hat{\alpha} = -0.03$   $[-0.06, -0.002]$ ); (iii)  
28 step-wise multivariable MR (MV MR) ( $\hat{\alpha} = -0.06$   $[-0.09, -0.04]$ ) where time spent watching  
29 television and past tobacco smoking (two proxies for potential confounders) were jointly  
30 modelled.

31 Through a detailed examination of the BMI-EDU causal relationship we demonstrated the  
32 utility of our PWC-MR approach in revealing distinct pleiotropic pathways and confounder  
33 mechanisms.

**NOTE: This preprint reports new research that has not been certified by peer review and should not be used to guide clinical practice.**

## 34 1 Introduction

35 Genome-wide association studies<sup>[1]</sup> (GWASs) have identified many genetic variants associated  
36 with multiple complex phenotypes, aiding us in annotating single nucleotide polymorphisms  
37 (SNPs) and their functions, as well as identifying putative causal genes. As sample sizes of  
38 GWASs increase, more SNP associations are revealed which improve various downstream analy-  
39 ses such as polygenic score prediction, pathway- and tissue-enrichment, and causal inference<sup>[2,3]</sup>.

40 Mendelian Randomisation<sup>[4,5]</sup> (MR), an approach generally applied through the use of genetic  
41 variants/SNPs as instrumental variables (IVs) to infer the causal relationship between an expo-  
42 sure or a risk factor  $X$  and an outcome  $Y$  of interest, has become increasingly used thanks to  
43 well-powered GWASs from which hundreds of genetic associations with heritable exposures can  
44 be used as IVs.

45 MR has three major assumptions concerning the the genetic variant  $G$  used as an instrument:  
46 (1) Relevance –  $G$  is strongly associated with the exposure. (2) Exchangeability – there is no  
47 confounder of the  $G$ -outcome relationship. (3) Exclusion restriction –  $G$  affects the outcome  
48 only through the exposure. Each instrument provides a causal effect estimate, which can then  
49 be combined with others using an inverse variance-weighting<sup>[6]</sup> (IVW) method to obtain an esti-  
50 mate of the total causal effect of the exposure on the outcome. This estimate is more reliable  
51 than observational associations due to it being more protected against unmeasured confounding  
52 and reverse causality, provided that the core conditions are met.

53 Thanks to well-powered GWASs we have also discovered that most genetic instruments are  
54 highly pleiotropic<sup>[7]</sup>, i.e. associated to more than a single trait. This has also been shown in  
55 phenome-wide association studies (PheWASs), where associations between a SNP and a large  
56 number of phenotypes are tested. The situation when a genetic variant influences multiple  
57 traits, but there is a primarily associated trait and all other trait associations are fully me-  
58 diated by the primary trait, is referred to as vertical pleiotropy. On the other hand, genetic  
59 variants that affect some traits through pathways other than the primary trait (the exposure) –  
60 a phenomena known as horizontal pleiotropy – are in direct violation of the exclusion restriction  
61 assumption and could lead to biased causal effect estimates. However, if the InSIDE assump-  
62 tion<sup>[8]</sup> (Instrument Strength is Independent of the Direct Effect on the outcome) holds and the  
63 direct SNP effects are on average null, then IVW will yield consistent causal effect estimates.  
64 There have been MR extensions to IVW such as MR-Egger to produce less biased causal ef-  
65 fect estimates if the InSIDE assumption holds and direct effects are not null on average. Note  
66 that violation of the InSIDE assumption leads to correlated pleiotropy, which can severely bias  
67 causal effect estimates. Such phenomenon may emerge as a result of a heritable confounder of  
68 the exposure-outcome relationship and has been modelled in the past<sup>[9,10]</sup>.

69 Well-powered GWAS may also provide confounded genetic associations through dynastic effects<sup>[3,11]</sup>,  
70 assortative mating<sup>[12,13]</sup>, and population stratification<sup>[14]</sup>. These phenomena can introduce cor-  
71 relation between an instrument and confounding factors, such as parental/partner traits or ge-  
72 netic ancestry leading to a violation of the exchangeability assumption and biased causal effect  
73 estimates. This type of confounding can be resolved when using family-based study designs<sup>[15,16]</sup>  
74 such as sibling-pair studies. Since genetic differences between sibling pairs are due to indepen-  
75 dent and random meiotic events, these effects are unaffected by population stratification and  
76 other potential confounders influencing the phenotype. This and other family-based designs  
77 have been used to obtain unbiased heritability estimates, validate GWAS results and test for  
78 unbiased causal effect estimates using MR<sup>[17,18]</sup>.

79 Another factor that can lead to complications in MR studies is the presence of heterogeneous  
80 causal effects emerging due to distinct biological mechanisms: various subtypes of the exposure  
81 (e.g. subcutaneous vs visceral adiposity) or different biological pathways through which the

82 exposure impacts the outcome (e.g. interaction between the exposure and other factors). To  
83 date, confounding of genetic associations, horizontal pleiotropy and heterogeneous causal effect  
84 have been largely treated as distinct mechanisms in MR modelling. However, what they have  
85 in common is that they can lead to variable causal effects estimated depending on the group of  
86 IVs used in the MR.

87 To address this, we introduce in this paper our approach of PheWAS-driven clustering of instru-  
88 mental variables (PWC-MR) and test the resulting clusters for distinct pathways or mechanisms  
89 that could underlie the overall causal effect of the exposure. Throughout the paper, we demon-  
90 strate the approach through the example of estimating the causal effect of body mass index  
91 (BMI) on educational attainment (EDU). This relationship has been analysed extensively in  
92 the past and family studies have shown that an apparent strong effect of higher BMI on lower  
93 educational attainment is shrunk to near zero when using family studies<sup>[17]</sup>. One explanation is  
94 that offspring BMI is influenced by parental alleles associated with parental (rearing) behaviour,  
95 which in turn modify the environment of the offspring. Such parental traits act as a confounder  
96 of the offspring genotype-EDU relationship, hence violate the exchangeability assumption of  
97 MR. Moreover, they confound the BMI-EDU association in the tested sample, violating the  
98 exclusion-restriction assumption and inducing correlated pleiotropy (see Figure 1a). Thus, it  
99 is plausible that some of the detected IV clusters arise through parental genetic confounding  
100 which may manifest statistically as horizontal pleiotropy. To test this, we ran a systematic con-  
101 founder search and probed the causal effect of the exposure conditional on candidate confounder  
102 traits.

## 103 2 Methods

### 104 2.1 Instrumental variable selection and PheWAS

105 As our primary analysis, we aimed to investigate the potential pleiotropy-patterns emerging  
106 from the grouping of IVs that are strongly associated with an exposure of interest, as outlined  
107 in Figure 1b. With BMI selected as the exposure trait, we obtained IVs from the Neale group’s  
108 UK Biobank GWAS analysis<sup>[19]</sup> (data sources can be found in Supplementary Table 1) by filtering  
109 for genome-wide significant SNPs (i.e. association p-value less than  $5 \times 10^{-8}$ ) followed by linkage  
110 disequilibrium (LD)-based clumping using the TwoSampleMR R package<sup>[20]</sup> with the following  
111 parameters: *clump\_kb* = 10,000, *clump\_r2* = 0.001, *pop* = “EUR” to obtain independent  
112 IVs.

113 This left us with 348 BMI-associated IVs, for which we ran PheWASs with 1,480 traits from  
114 the Neale group UK Biobank GWAS analysis<sup>[19]</sup>. We extracted for each trait and for each SNP  
115 the association effect and the corresponding standard error, creating a data matrix of 348 SNPs  
116 by 1,480 traits. For the 1,480 traits, we also extracted details such as variable type, origin and  
117 complete sample size, among others.

#### 118 2.1.1 Quality control

119 We removed traits from the PheWAS data matrix that had missing association effects as well as  
120 duplicates (keeping the most recent version). Furthermore, we filtered out traits for which the  
121 effective sample size was less than 50,000 due to their low power of association, leaving us with  
122 424 traits.

123 Using genetic correlation data from the Neale group<sup>[19]</sup>, we further removed traits that had a  
124 high genetic correlation with BMI, i.e. the exposure, ( $r^g > 0.75$ ), to avoid obvious repetitions of  
125 traits closely related to it. The resulting association effect data matrix of 348 SNPs and 407 traits  
126 was then standardised (SNP effects are on a SD/SD scale) and used for further analysis. Note  
127 that for simplicity, effect sizes for binary traits were treated as those of continuous traits.

128 In order to test for invalid IVs, we performed a trait-wide variant of Steiger-filtering<sup>[21]</sup>. Specif-  
129 ically, for each SNP, we tested if any of the traits had a significantly stronger (in terms of  
130 explained variance) association compared to that of the exposure. The significance threshold  
131 for this one-sided t-test was corrected for using the total number of traits remaining (p-value  
132  $< 0.05/407$ ). This revealed 24 SNPs more strongly associated to traits other than BMI (such as  
133 ‘Whole body water mass’, ‘Basal metabolic rate’ and ‘Sitting height’) that were then removed  
134 from further analysis.

### 135 2.2 K-means clustering and trait identification

136 With the aim of discovering distinct meaningful groups of SNPs among the 324 IVs, we proceeded  
137 with the clustering of the SNPxTrait association effect matrix using the K-means algorithm<sup>[22]</sup>.  
138 Taking the absolute standardised effects matrix, we normalised the data frame with respect to  
139 the SNPs such that the variance of the SNP effects across all the traits equalled 1. We used the  
140 absolute effects to cluster, in order to ensure that negatively correlated traits were considered  
141 similar by the Euclidean distance based similarity measure of the k-means clustering. We then  
142 compared the performance of the clustering with different number of clusters ranging from two  
143 to 50, by measuring the Akaike Information Criterion (AIC). After finding the number of clusters  
144 with the lowest AIC score (six clusters), we proceeded with the assignment of each SNP to one  
145 of the six clusters.

146 In order to identify traits that were particularly associated to SNPs in each of the six clusters,

147 we computed an enrichment ratio (ER) in this way:

148 For each trait  $t$ , we calculated the per-SNP average squared effect in a given cluster  $j$ , denoted  
 149 as  $\sigma_{j,t}^2$ . Given that SNP  $i$  belongs to cluster  $j$ ,  $\sigma_{j,t}^2$  was calculated as follows:

$$\sigma_{j,t}^2 = \frac{1}{|c_j|} \sum_{i \in c_j} \beta_{i,t}^2$$

150 where  $c_j$  represents the set of SNPs in cluster  $j$  and  $|c_j|$  its cardinality. We then normalised these  
 151 per-SNP average squared effects for each cluster ( $k$  total clusters) across all traits to obtain the  
 152 enrichment ratio (ER),  $R_{j,t}$ :

$$R_{j,t} = \frac{\sigma_{j,t}^2}{\frac{1}{K} \sum_{k=1}^K \sigma_{k,t}^2}$$

153 where  $K$  is the total number of clusters. For each cluster ( $j$ ), traits were then prioritised by the  
 154 (highest) value of ER ( $R_{j,t}$ ).

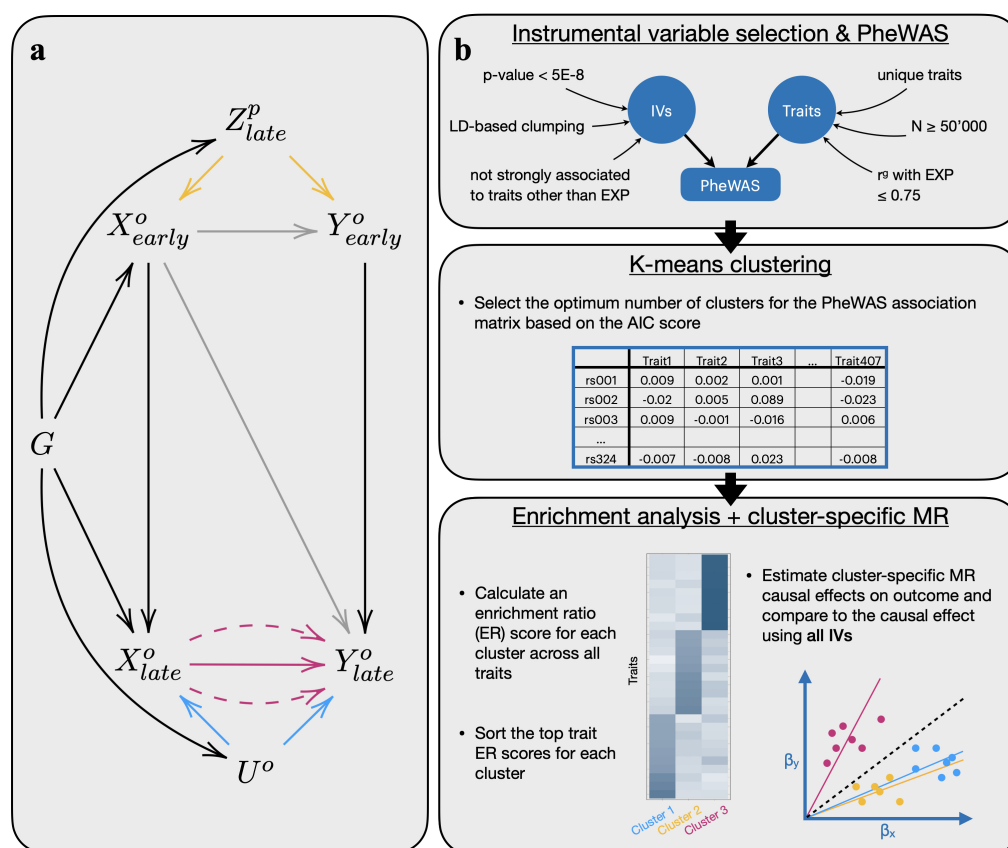

**Figure 1: Directed Acyclic Graph (DAG) describing a plausible model and the flow diagram representing how the PWC-MR approach aims to disentangle causal effect between trait pairs from confounding or pleiotropy.** Panel a illustrates a DAG involving early and later-in-life (late) versions of different traits. In our example:  $X$  and  $Y$  could be BMI and EDU, respectively,  $U$  represents a heritable confounder, whereas  $Z$  represents a parental trait involved in exerting dynastic effects. The superscripts  $p$  and  $o$  stand for parental and offspring respectively, and the dashed arrows from  $X$  to  $Y$  represent the different biological mechanisms through which a causal effect can emerge. Panel b represents the main steps of the PWC-MR method: (i) Instrument selection and PheWAS; (ii) IV clustering; and (iii) Enrichment analysis and cluster specific MR.

### 155 **2.2.1 Causal effect estimate per cluster**

156 We measured the cluster-specific IVW causal effect estimate on the outcome (EDU) using the  
157 standardised SNP effects in each cluster, and then compared these estimates to the causal  
158 effect estimate using all SNPs. We used the TwoSampleMR R package<sup>[20]</sup> for this analysis, and  
159 although we use two-sample MR techniques despite having a close to complete sample overlap,  
160 this does not lead to substantial biases<sup>[23]</sup>. Measures of IV heterogeneity are calculated using the  
161 Cochran's Q-statistic<sup>[24]</sup> for the IVW method for each cluster. Furthermore, average cluster-  
162 heterogeneity (per-IV variance) is also calculated for each cluster from the above-mentioned  
163 parameter.

164 As sensitivity analyses, PWC-MR was repeated twice, once with a different exposure trait  
165 (replacing BMI with childhood BMI), and another with a different outcome trait (replacing  
166 EDU with systolic blood pressure).

### 167 **2.3 Systematic confounder search**

168 In order to decide which of the emerging clusters represent genetic confounding or true biological  
169 heterogeneity, we systematically searched for BMI-EDU confounders. To do this, we investigated  
170 the bi-directional causal effects that each trait had on both the exposure and the chosen outcome.  
171 Firstly, an extra filtering step was done where traits that were highly genetically correlated with  
172 the outcome ( $r^g > 0.75$ ) were removed from the total 407 traits of the previous analysis.

173 Then we ran a bidirectional MR for the remaining uncorrelated traits using the TwoSampleMR  
174 R package<sup>[20]</sup>, and obtained four sets of causal effect measurements per trait (bidirectional, two  
175 different outcome traits - BMI and EDU). To select bidirectional causal effect estimates from  
176 those calculated by the different methods in the TwoSampleMR package<sup>[20]</sup> (Weighted median,  
177 Inverse variance weighted, Simple mode, and Weighted mode), we ordered the p-values of the  
178 causal effect estimates for the different methods and selected the estimate of the second most  
179 significant method to ensure that at least one other method supports the causal claim.

180 The next step was to identify the direction of causality. To do so, we performed a one-sided t-test  
181 on the estimated causal effect between the trait and the exposure, BMI. If the t-test association  
182 p-value was  $< 0.05$ , then the trait had a (nominally) significantly larger effect on the exposure,  
183 and if the p-value was  $\geq 0.95$ , then the exposure had a (nominally) significantly larger effect  
184 on the trait. For all the p-values in between, it was challenging to assign a direction in which  
185 the causal effect was stronger, and thus these traits were not further categorised. The p-value  
186 thresholds we apply are not intended to suggest that there is a transition point at which the  
187 meaning of associations change. Rather we use these as a heuristic that is required to control  
188 type I error rate at an arbitrary (5%) threshold.

189 The same was done to explore the relationship between the traits and the outcome trait (EDU).  
190 This allowed us to classify the traits into candidate confounders, mediators, colliders and other  
191 categories (as seen in the middle panel of Supplementary Figure S1). For example, a confounder  
192 was defined as a trait with a significantly larger effect on both exposure and outcome than the  
193 reverse. We then focused only on the confounders which can distort MR estimates and filtered  
194 them further to make sure that they have at least a nominally significant MR estimate (p-value  
195  $< 0.05$ ) on both BMI and EDU. We were lenient in our categorisation of candidate traits as  
196 adding potentially irrelevant traits would not bias the multivariable causal effect of BMI in the  
197 next step. Mediators and colliders were not considered further since their inclusion into an  
198 MVMR does not alter the exposure's causal effect. The same holds for traits with a direct effect  
199 on either the exposure or the outcome only.

200 Furthermore, to test how compatible the two lines of analysis were, we examined the cluster-  
201 specific enrichment ratio values for the set of candidate confounder traits we obtained.



### 202 **2.3.1 Multivariable MR**

203 Focusing on the candidate confounder traits resulting from the systematic search that could bias  
204 the causal effect estimate between the exposure-outcome pair, we first ran a stepwise multivari-  
205 able MR (MVMR) (adapted from the bGWAS R package<sup>[25]</sup>) with them as exposures to test  
206 their effect on our chosen outcome, EDU.

207 To do this, we created a Z-score matrix combining genome-wide significant (p-value less than  
208  $5 \times 10^{-8}$ ) and independent (LD-clumped  $clump\_kb = 5,000$ ,  $clump\_r2 = 0.01$ ) SNPs and their  
209 Z-scores for the candidate confounder traits, given that each SNP had an effect that is genome-  
210 wide significant for at least one of the candidate traits. We then removed any trait that had less  
211 than three instruments, leaving us with a Z-score matrix of 274 SNPs and 5 traits. Using this  
212 Z-score matrix as input for step-wise MVMR, we obtained a final list of traits with multivariable  
213 causal effects with a p-value  $< 0.05/5$  on our chosen outcome. To ensure the strength of the  
214 instruments used for running MVMR, we calculated the conditional F-statistic for our main  
215 exposure (BMI) given each of the surviving traits and their different combinations. We then  
216 ran standard MVMR using the combination of traits with a conditional F-statistic of BMI  $> 8$ ,  
217 and BMI as exposures to estimate the conditional causal estimates on EDU.

218 We were more lenient with the conditional F-statistic threshold (typically 10)<sup>[26]</sup> to ensure that  
219 epidemiologically relevant traits are included in the MVMR.

## 220 **2.4 Relation to other approaches**

### 221 **2.4.1 Comparison against MR-Clust**

222 We compared the k-means clustering of BMI IVs against another IV clustering method called  
223 MR-Clust<sup>[27]</sup>, which requires as input the unstandardised SNP effects on both the exposure and  
224 the outcome, as well as the standard error of the SNP on each. To do so, we performed a Fisher's  
225 exact test to examine the frequency distribution of SNPs in each of the k-means clusters against  
226 the MR-Clust clusters.

### 227 **2.4.2 Colocalisation analysis**

228 To further interpret the findings of the IV clustering, we sought to test if specific patterns of  
229 colocalisation in different tissue types appear for the different IV clusters.

230 To do this, we reran the steps detailed in Leyden et al.<sup>[28]</sup> for the 324 BMI IVs used in this  
231 work. For each IV, we tested for genetic colocalisation between the BMI GWAS data and the  
232 gene expression (eQTL) data of both subcutaneous adipose and brain tissue (data sources can  
233 be found in Supplementary Table 1). For each SNP tested, we took a margin of 200kb up- and  
234 downstream, and used the coloc R package<sup>[29]</sup> to test the SNP's colocalisation with each gene  
235 found in that region, once using brain eQTL data, and another colocalisation using adipose  
236 eQTL data. We declared colocalisation if the posterior probability of the model sharing a single  
237 causal variant was larger than 80%. For each of the aforementioned clusters, we investigated  
238 if the IVs were more strongly enriched for or depleted in one tissue or the other using Fisher's  
239 exact test.

## 240 **3 Results**

### 241 **3.1 Overview of the method**

242 We applied the PWC-MR approach to investigate potential horizontal pleiotropic effects (emerging due to heritable confounders, dynastic effects, genetic subtypes of obesity and other pleiotropic mechanisms, see Figure 1a) of BMI on educational attainment. The analysis focused on grouping the IVs of the exposure by running a PheWAS-based clustering to reveal distinct mechanisms or pathways underlying their overall effect on the exposure (Figure 1b). This was done by obtaining the standardised PheWAS association of the BMI IVs across a filtered set of 408 traits, and running a k-means clustering on the resulting matrix. This resulted in six clusters of IVs for BMI, which were then annotated by traits based on the association of the cluster-member SNPs with each trait. Specifically, for each cluster-trait pair we computed the average explained variance of the trait by the SNPs of the given cluster. This yielded for each cluster-trait pair an enrichment ratio (ratio of the average explained variances) and we chose the top ten traits with the highest enrichment ratio for each cluster. Furthermore, the causal effect of each cluster's IVs on education was calculated and compared against each other and that of the causal effect obtained using all BMI IVs.

256 To complement our findings from the clustering-based analysis, we explored (i) the BMI-EDU causal relationship using sib-regression SNP effect sizes<sup>[18]</sup>, (ii) the childhood BMI-EDU causal relationship, (iii) replacing the outcome trait with systolic blood pressure (SBP), and finally (iv) the potential role of each of the filtered set of traits as a confounder of the BMI-EDU relationship.

261 We implemented the latter one by systematically running bidirectional MR between each of the traits and either BMI or EDU as outcome, then classifying the traits depending on their bidirectional associations with both BMI and EDU. The resulting set of candidate confounder traits was further analysed for its potential to bias the causal effect of BMI on EDU. To assess this, we ran stepwise MVMR and finally calculated the causal effect of BMI on EDU conditional on the surviving set of candidate confounder traits of the BMI-EDU relationship.

267 To further understand the emerging clusters, we sought to uncover tissue-specific mechanisms. To do this, we performed a colocalisation analysis of the BMI and gene expression association signals at each locus around ( $\pm 400$ kb) the 324 BMI IVs. For the gene expression association we used eQTL data from both adipose and brain tissue. This yielded a proportion of brain-vs-adipose colocalised IVs for each cluster.

### 272 **3.2 PheWAS-based K-means clustering and trait identification**

273 After identifying 324 genome-wide significant SNPs as IVs for BMI, and selecting 407 filtered traits to run PheWAS on, we obtained a standardised effect matrix of the 324 IVs on the 407 traits. Normalising the matrix by IVs and running K-means clustering on it revealed that six clusters yielded the lowest AIC score (Supplementary Figure S2) when compared to varying the number of clusters from two to 50. The number of SNPs in each of the six clusters were: 32, 98, 35, 41, 69, 49 respectively (Supplementary Table 2).

279 Next, we computed an enrichment ratio (ER) to identify with which traits the SNPs in each cluster were strongly associated. The overall ER value between clusters was roughly centred around 1, however clusters #2, #3, #4, and #6 had some large ER values (see Supplementary Figure S3). Visualising the top 10 enriched traits in each cluster and their ER values in Figure 2 and Supplementary Table 3, we see that cluster #2 is strongly enriched for lean mass traits such as 'Trunk fat-free mass' and 'Whole body fat-free mass'.



285 Similarly, cluster #3 seemed to mostly be enriched for blood- and body stature-related traits  
 286 such as ‘Platelet count’ and ‘Standing height’, while cluster #4 was enriched for traits related  
 287 to socio-economic position (SEP) such as ‘Job involves heavy manual or physical work’, ‘Time  
 288 spent outdoors in summer’, and ‘Fluid intelligence score’. Lastly cluster #6 was enriched for  
 289 food supplements/nutrients such as ‘Folate’ and ‘Potassium’.

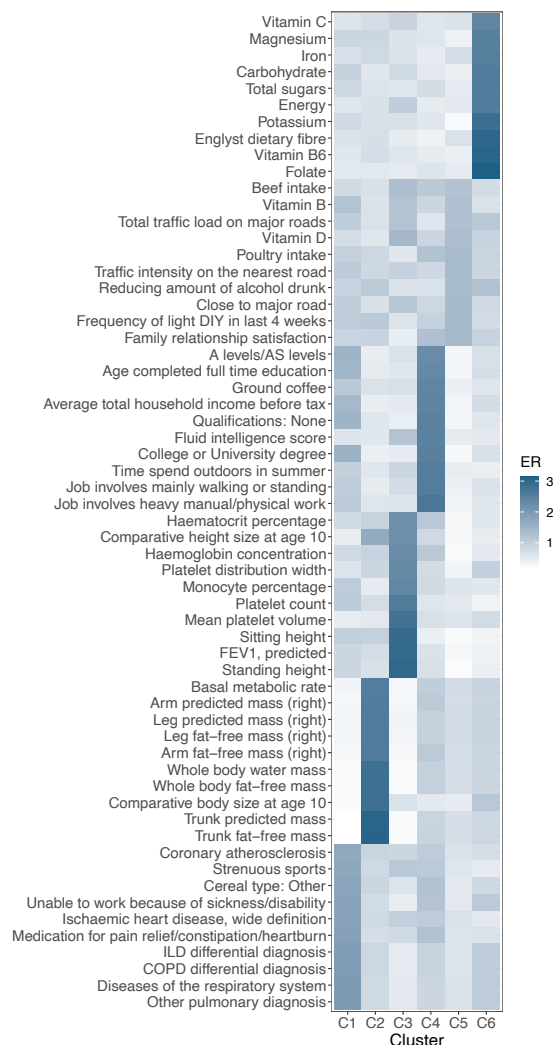

**Figure 2: Heatmap of the enrichment ratio of the top 10 traits in each cluster.** K-means clustering of BMI revealed six clusters with the following trait enrichment ratios.

### 290 3.2.1 Causal effect estimate per cluster

291 To test whether the clusters had different causal effects on a selected outcome than the overall  
 292 causal effect (using all IVs), we computed the IVW causal effect estimate of each cluster on  
 293 education using cluster-specific IVs. As seen in Figure 3a and Supplementary Table 4, the  
 294 causal effect estimates between the different clusters are significantly heterogeneous (Q-test  
 295 value = 130.61, p-value <  $10^{-300}$ ). Clusters #2 and #5 had the smallest causal effect estimates  
 296 of  $-0.09$  (p-value =  $1.23 \times 10^{-5}$ ) and  $-0.12$  (p-value =  $5.22 \times 10^{-6}$ ) respectively, where cluster  
 297 #2 was enriched for lean-mass traits. These estimates are consistent with those obtained from  
 298 within-family studies, which are relatively immune to confounding. By contrast, clusters #1 and  
 299 #4 had the largest negative causal effect estimates of  $-0.44$  (p-value =  $7.78 \times 10^{-20}$ ) and  $-0.49$

300 (p-value =  $1.63 \times 10^{-44}$ ) respectively, where cluster #4 was strongly enriched for SEP-related  
 301 traits.  
 302 All the clusters were less heterogeneous than the group of all the IVs combined (see ‘Avg\_het’  
 303 in Supplementary Table 4).

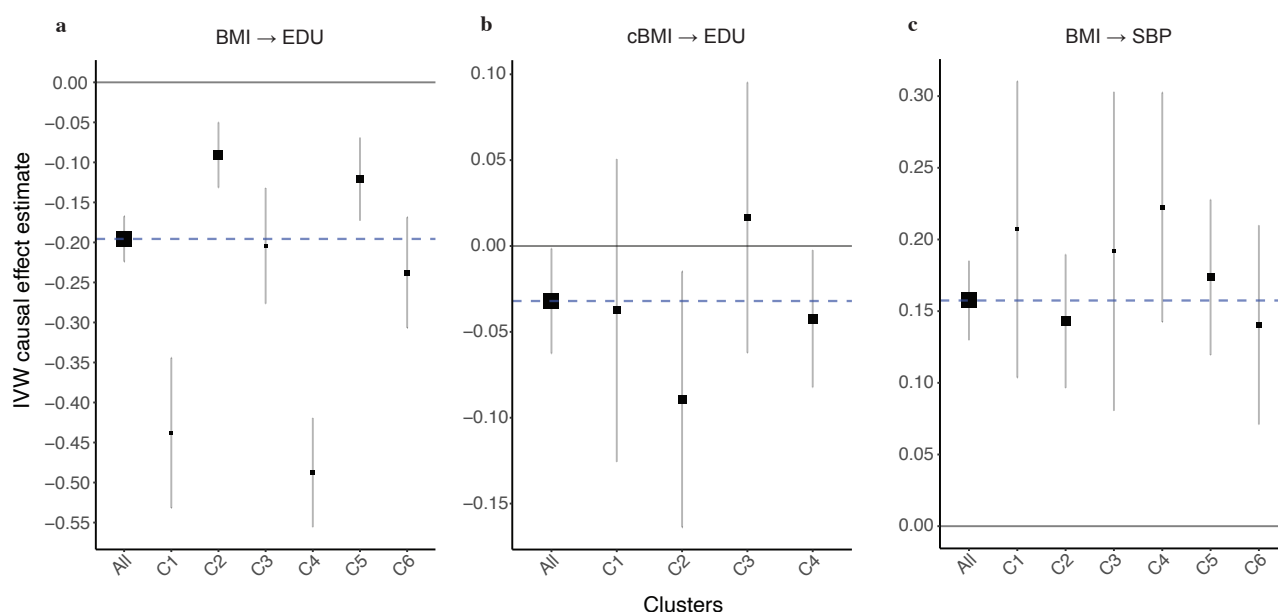

**Figure 3: Forest plot of IVW causal effect estimate on outcome using either all exposure IVs or cluster-specific IVs.** Panel a shows causal effect estimates of adult BMI on EDU, panel b proxy of childhood BMI (cBMI) on EDU, and panel c adult BMI on SBP. Horizontal error bars represent the 95% confidence interval. The blue vertical line represents the causal effect estimated using all BMI IVs. Box sizes of clusters represent the proportion of the number of IVs in each cluster to the total.

### 304 3.3 Post hoc analyses

305 To test the robustness of the PWC-MR results, we performed four additional analyses. First,  
 306 we analysed the same exposure and outcome, but using sib-regression-based SNP effect sizes  
 307 instead of SNP effects from GWAS of unrelated samples. Second, we replaced the exposure with  
 308 childhood BMI and estimated its causal effect on EDU. Third, we replaced the outcome, EDU,  
 309 with SBP. Finally, we executed a systematic search for confounders to include in a multivariable  
 310 MR analysis.

#### 311 3.3.1 Sib-regression MR

312 In Howe et al.(2022)<sup>[18]</sup>, within-sibship (within-family) meta-analysed GWAS estimates were  
 313 generated from 178,086 siblings across 19 cohorts. Using these effect estimates, MR was per-  
 314 formed with BMI as exposure on multiple traits, including educational attainment. They used  
 315 418 independent and genome-wide significant genetic variants for BMI, and estimated its effect  
 316 on EDU using IVW to be -0.05 (95% CI: -0.09, -0.01).

317 They also used jackknife to estimate the standard error of the difference between the sib-  
 318 regression MR estimate and that of the GWAS of unrelated samples MR estimate, -0.19 (95%  
 319 CI: -0.22, -0.16). Using the difference Z-score to generate a p-value for heterogeneity between  
 320 the two estimates revealed a p-value < 0.001.

### 3.3.2 Causal effect of childhood BMI on Educational attainment

We used the UK Biobank trait ‘Comparative body size at age 10’ as a proxy for childhood BMI – a measure that has been validated against measured BMI in childhood<sup>[30,31]</sup> – for the exposure trait. Childhood BMI is expected to be less confounded by (parental) SEP compared to adult BMI and hence we expect to see a less biased causal effect on EDU. For this trait, we had 171 genome-wide significant SNPs that we used as IVs for the analysis. Of these, 16 SNPs were more strongly associated to traits other than childhood BMI and were thus excluded from further analysis. The standardised effect matrix of the remaining 155 SNPs across 461 traits was clustered into four clusters (yielding optimal AIC), each containing 37, 42, 32, 44 IVs respectively (Supplementary Figure S4, Supplementary Table 6).

Analysing the trait enrichment for each cluster revealed only two clusters with high ER values: clusters #2 and #4 (Supplementary Figure S5, Supplementary Table 7). Cluster #2 had only two traits with ERs greater than 2, which were ‘Number of fluid intelligence questions attempted within time limit’ and ‘Fluid intelligence score’, whereas cluster #4 was highly enriched for body-measurement/fat-mass traits such as ‘Waist circumference’ and ‘Whole body fat mass’ (see Supplementary Figure S6). However, calculating the IVW causal effect estimate for each cluster and comparing it to the estimate calculated using all IVs revealed homogeneous causal effect estimates with a Q-statistic of 3.84 (p-value of 0.43) as seen in Figure 3b and Supplementary Table 8. Cluster #2 had a causal effect estimate of  $-0.09$  (95% CI:  $-0.1638, -0.0148$ ), and cluster #4 had a causal effect estimate of  $-0.04$  (95% CI:  $-0.0823, -0.0024$ ). Noteworthy is the finding that the IVs of cluster #2 were more heterogeneous than all the IVs combined. Thus, we obtained a massively attenuated causal effect of BMI on EDU, when childhood BMI is used as an exposure. Reassuringly, no SEP-enriched cluster emerged and the cluster specific causal effects were homogeneous.

### 3.3.3 Causal effect of BMI on SBP

To find further evidence that our approach does not always reveal distinct causal effects when the causal effect is non-null, we replaced EDU with SBP as outcome. Namely, we tested a well-established non-null causal relationship that is hypothesised to not be biased by pleiotropy or confounding: BMI’s effect on SBP. Using the same six clusters previously obtained for BMI, we calculated the estimated causal effect of each of the clusters compared to using all the IVs combined on SBP. This revealed a homogeneous set of causal effect estimates (Q-test value of 4.49, p-value = 0.61), with the IVW estimate using all IVs being 0.15 (p-value =  $1.09 \times 10^{-28}$ ) as seen in Figure 3c and Supplementary Table 5.

### 3.3.4 Systematic confounder search and MVMR analysis

Given our suspicion that the large BMI-EDU causal effect is driven by heritable confounders, we performed a systematic search to reveal traits that may be potential confounders. As described in the Methods section, the strength of the bidirectional effect of the traits on either the exposure or the outcome determined their categorisation. This led to the identification of 19 traits that were found to be candidate confounder traits (Supplementary Table 9). Matching the 19 confounder traits from this analysis to their respective ER across the six clusters from the previous analysis revealed higher ERs in cluster #1 and cluster #4 (see Supplementary Figure S7), which was associated with SEP-related traits. Noteworthy is that the traits labelled as candidate confounders were predominantly environmental exposures, such as ‘Exposure to tobacco smoke outside home’ and ‘Transport type for commuting to job workplace: Cycle’. Furthermore, these candidate confounder traits are attributed as *candidate* or *potential* confounders since they are most likely only genetic correlates of the true confounding traits of the

367 BMI-EDU relationship and not act as true confounders themselves.

368 To investigate the possible biasing effect that potential confounder traits can have on the causal  
369 relationship of BMI on EDU, we ran a stepwise MVMR on these 19 candidate confounder  
370 traits (Supplementary Table 9). During the creation of the Z-score matrix of SNPs and traits,  
371 only five traits had at least three genome-wide significant and independent SNPs whose effects  
372 could be used in the analysis. These five traits were: ‘Time spent watching television (TV)’,  
373 ‘Usual walking pace’, ‘Past tobacco smoking’, ‘Frequency of tiredness / lethargy in last 2 weeks’,  
374 and ‘Average weekly beer plus cider intake’. Of these, only the first three had a significant  
375 causal effect estimate on EDU (p-value < 0.05/5) as estimated by stepwise MVMR, and were  
376 subsequently used as exposures alongside BMI in a standard MVMR analysis.

377 To ensure the strength of the IVs used in the MVMR analysis, we calculated the conditional  
378 F-statistic and the MVMR causal effect estimate of BMI given various combinations of the 3  
379 remaining candidate confounder traits. We saw the expected trend of a decreasing conditional  
380 F-statistic with the addition of traits and their IVs to the analysis (see Supplementary Figure  
381 S8). We note that the causal effect estimate of BMI on EDU decreases when any combination of  
382 the candidate confounder traits is used with BMI as exposure in comparison to the univariable  
383 MR causal effect estimate of BMI on EDU ( $-0.19$ , p-value =  $7.11 \times 10^{-41}$ ). We settled on  
384 the combination of candidate confounder traits yielding a conditional F-statistic for BMI > 8,  
385 for which the corresponding causal effect estimates are reported in Table 1 below. This choice  
386 was a compromise between two sources of biases: weak instrument bias *vs* upward bias due to  
387 omitting relevant confounders.

| Trait | Description                    | $\alpha$ estimate | SE     | P-value  | Conditional F-statistic |
|-------|--------------------------------|-------------------|--------|----------|-------------------------|
| 1070  | Time spent watching television | -0.4077           | 0.0374 | 3.46E-23 | 10.80                   |
| 1249  | Past tobacco smoking           | 0.1394            | 0.0384 | 3.39E-04 | 15.74                   |
| 21001 | Body mass index (BMI)          | -0.0633           | 0.0136 | 4.98E-06 | 56.89*                  |

**Table 1:** MVMR analysis results of BMI and two candidate confounder traits on education.  $\alpha$ : causal effect estimate. The conditional F-statistic column refers to BMI’s calculated conditional F-statistic on each trait. The value in that column for BMI however, indicated by \*, refers to BMI’s F-statistic calculated when running a univariable MR with only BMI as exposure.

### 388 3.4 Relationship with other approaches

#### 389 3.4.1 Comparison against MR-Clust

390 Other known IV clustering methods include MR-Clust<sup>[27]</sup>, which attempts to cluster variants  
391 with similar causal effect estimates together following the hypothesis that exposures can affect  
392 an outcome by distinct causal mechanisms to varying extents. MR-Clust also accounts for the  
393 possibility of spurious clusters by assigning IVs with uncertain causal effect estimates to ‘null’  
394 or ‘junk’ clusters.

395 We compared the k-means clustering of BMI IVs against that of MR-Clust with EDU as the  
396 outcome. The results revealed two main clusters as well as a ‘null’ cluster. Cluster #1 had 35  
397 SNPs, 13 of which had an inclusion probability greater than 80%. Cluster #2 had 171 SNPs,  
398 36 of which had an inclusion probability greater than 80%, and the remaining 142 SNPs were  
399 categorised into the ‘null’ cluster as seen in Supplementary Figure S9. The mean causal effect  
400 estimate of SNPs in cluster #1 was  $-0.496$ , whereas it was  $-0.246$  for cluster #2. Searching  
401 for trait associations for the SNPs in each of the clusters revealed that body measurement traits  
402 like ‘Arm fat mass’ or ‘Body fat percentage’ are associated to SNPs in both clusters, while

403 SEP-related traits such as ‘Fluid intelligence score’ or ‘Time spent watching television’ were  
 404 associated to more SNPs in cluster #1 than in cluster #2.

405 Comparing the SNP clustering between the k-means method against that of MR-Clust in Table  
 406 2 below, we see that cluster #1 in MR-Clust, which seems to be more strongly enriched for  
 407 SEP traits than cluster #2, has SNPs that were similarly clustered in clusters #1 and #4 using  
 408 k-means, matching their large negative causal effect of BMI on EDU. However, the same distinct  
 409 comparison cannot be made for SNPs in cluster #2 of MR-Clust.

410 Of the 12 Fisher’s exact tests performed to examine the contingency of SNPs in the two separate  
 411 sets of clusters, four tests revealed a significant association: SNPs in cluster #1 of MR-Clust  
 412 were significantly associated with SNPs in clusters #1, #2 (lean-mass traits), #4 (SEP-related  
 413 traits) and #5 of the K-means clustering.

|          | Cluster1 | Cluster2 | Cluster3 | Cluster4 | Cluster5 | Cluster6 |
|----------|----------|----------|----------|----------|----------|----------|
| Cluster1 | 13       | 1        | 0        | 13       | 0        | 5        |
| Cluster2 | 15       | 38       | 21       | 26       | 32       | 29       |
| Null     | 4        | 59       | 14       | 2        | 37       | 15       |

**Table 2:** Cross table of BMI IVs clustered using K-means and MR-Clust.

### 414 3.4.2 Colocalisation analysis

415 With the aim of finding supporting evidence for the k-means clustering and enrichment analy-  
 416 sis, we ran a genetic colocalisation analysis on BMI IVs and two types of tissue: subcutaneous  
 417 adipose and brain, the results of which can be found in Supplementary Tables 10 and 11 respec-  
 418 tively.

|         | Cluster1 | Cluster2 | Cluster3 | Cluster4 | Cluster5 | Cluster6 |
|---------|----------|----------|----------|----------|----------|----------|
| Adipose | 9        | 9        | 14       | 3        | 6        | 5        |
| Brain   | 3        | 3        | 4        | 1        | 2        | 4        |
| Both    | 1        | 2        | 1        | 1        | 4        | 4        |
| Neither | 29       | 77       | 36       | 23       | 53       | 47       |

**Table 3:** Cross table indicating the number of genes whose expression colocalises in adipose/brain tissue with BMI. The colocalisation exercise was performed at loci-defined BMI IVs falling into particular clusters. Colocalisation was defined as the posterior probability of both GWAS and eQTL being associated is  $\geq 0.8$  in either brain or adipose tissue or both.

419

420 Running a set of Fisher’s tests to compute the overlap between the membership of the SNPs in  
 421 the six clusters and their tissue of colocalization did not reveal any association between clusters  
 422 and tissues.

## 423 4 Discussion

424 We have developed a method that performs informative clustering of IVs by utilising their  
425 association with a large number of traits. Our use of PheWAS data to guide the clustering of  
426 IVs has revealed distinct mechanisms by which exposure effects could act on outcomes. For our  
427 exposure, BMI, six distinct clusters were obtained through optimal K-means clustering. These  
428 clusters had well-defined trait enrichments, with clusters matching SEP-related, substrate, and  
429 body measurement traits. Estimating individual causal effects of each cluster on EDU as an  
430 outcome revealed heterogeneous causal effect estimates which allowed us to further strengthen  
431 our suspicion that the MR estimate for the causal effect of BMI on EDU is upward biased when  
432 using population-based SNP effect size estimates due to confounding.

433 We note from MR analysis run using within-sibling GWAS data<sup>[18]</sup> that the causal effect estimate  
434 between BMI and EDU is  $-0.05$  (95% CI:  $-0.09, -0.01$ ), which is smaller than the causal effect  
435 estimate seen using population based GWAS data ( $-0.19$ , 95% CI:  $-0.22, -0.16$ ). Investigating  
436 the various mechanisms or pathways through which BMI could have a causal effect estimate  
437 on EDU through trait-enrichment analysis has revealed notable causal effect estimates from  
438 two clusters: one with a strongly negative MR estimate whose trait enrichment reflects shared  
439 mechanisms with socio-economic factors, and another cluster with close to zero causal effect  
440 estimate enriched for lean-mass traits. MR has typically presented bias due to heterogeneous  
441 causal effects emerging via distinct pathways and bias due to confounding of the instrument-  
442 outcome association as being separate mechanisms. Here, we have illustrated that a pheWAS-  
443 based clustering approach can classify instruments into clusters, some of which correspond to  
444 different pathways, while others include IVs that are primarily confounder-associated. Our  
445 results have two major implications: 1) The lean-mass-related IV cluster indicated a close to  
446 zero causal effect of BMI on EDU. 2) We revealed that the SEP-related IVs suggest a sizeable  
447 negative effect of BMI on EDU.

448 In order to substantiate our findings, we performed several follow-up analyses. First, sib-  
449 regression based MR of BMI on EDU recapitulated the close-to-zero causal effect obtained  
450 for the body-mass specific cluster of IVs. This indicates that many IVs for adult BMI (from  
451 population-based GWAS) represent indirect (parental/dynastic) effects, which are associated  
452 rather with a rearing-related parental trait and not primarily with offspring BMI. Second, re-  
453 placing adult BMI with childhood BMI (much less associated with SEP) as exposure in the  
454 PWC-MR analysis confirmed a negligible causal effect estimate ( $-0.03$ ,  $p$ -value =  $0.04$ ), and  
455 the four emerging clusters showed homogeneous causal effect estimates indicating the lack of  
456 confounding or biasing effects. This comparison was supported by the growing evidence showing  
457 that genetic variants have varying effects on BMI or body size at different stages of life<sup>[32,33]</sup>,  
458 and that the UK Biobank proxy trait ‘Comparative body size at age 10’ captures childhood BMI  
459 well<sup>[30]</sup>. One of the four clusters was strongly enriched for body-measurement/fat-mass traits  
460 whereas the second most strongly enriched cluster had only two mildly enriched SEP-related  
461 traits. This finding means that as opposed to adult BMI, childhood BMI genetics are unrelated  
462 to childhood (i.e. parental) SEP. It is also interesting to note that although fat-mass traits are  
463 strongly enriched for using childhood BMI IVs alongside lean-mass traits, these same traits are  
464 less enriched for using adult BMI IVs. Thus, IVs associated with body-mass related traits seem  
465 to be underlying the true nominally significant and minuscule causal effect between BMI and  
466 EDU. Furthermore, out of the 41 adult BMI IVs that make up cluster #4 (SEP-related traits),  
467 only three were found to be in LD with childhood BMI IVs in cluster #2 (enriched for two  
468 SEP-related traits).

469 In Howe et al. (2022), assortative mating, dynastic effects and population stratification were all  
470 considered candidate mechanisms for biased population-based GWAS effect estimates. Given



471 our observations, a possible explanation is a dynastic effect of parental SEP traits acting as a  
472 confounder on both adult EDU and adult BMI (as seen in Figure 1a). This effect is direct on  
473 adult EDU but could affect adult BMI indirectly through either of two ways or both to a certain  
474 extent: (i) Parental SEP has a direct effect on the offspring's SEP as an adult, which in turn has  
475 an effect on offspring adult BMI<sup>[34]</sup>, or (ii) parental SEP – as an indicator of childhood social  
476 circumstances – may have an effect through this on the offspring's (adult) BMI.

477 To explore the relevance of the obtained six clusters of IVs, we replaced EDU with SBP as the  
478 outcome of interest since within-sibling GWAS MR results showed no difference when compared  
479 to population GWAS MR results, indicating that there seems to be no bias in the causal effect  
480 estimate due to pleiotropy or confounding. Our analysis revealed that for the six clusters at-  
481 tributed to BMI, their causal effect estimate on SBP was homogeneous with the estimate using  
482 all SNPs (0.16,  $p$ -value =  $1.09 \times 10^{-28}$ ). As there is no significant heterogeneous effects and  
483 all the cluster causal effects agree, we can conclude that there is no other confounding effects  
484 biasing the causal effect estimate. It is reassuring to note that our PWC-MR approach does  
485 not always seek to identify distinct causal effects, confirming that confounding mechanisms are  
486 specific to certain exposure-outcome pairs.

487 Finally, our systematic confounder search coupled with stepwise MVMR has pinpointed TV  
488 watching and smoking as two candidate confounder traits (maybe acting as a correlate of parental  
489 SEP) that may bias standard MR analysis of the BMI-EDU relationship: upon accounting for  
490 these two traits, BMI exhibits strongly attenuated causal effect on EDU.

491 Comparing our method to other IV clustering methods such as MR-Clust does not reveal strong  
492 concordance in the findings. MR-Clust takes as input the exposure and outcome effects as  
493 well as their standard errors and attempts to cluster the exposure IVs based on the possible  
494 similarity between each IV's causal effect. When using BMI and EDU as exposure and outcome  
495 respectively, MR-Clust revealed two main clusters alongside a null cluster. Both of the clusters  
496 were enriched for a variety of traits including body-measurement traits, both lean- and fat-mass,  
497 as well as SEP-related traits. The causal effect estimates of both clusters were strongly negative,  
498 similar to using all IVs in an MR analysis for this trait pair.

499 The most apparent difference between the clustering of our method and that of MR-Clust is  
500 our use of external information for the exposure and our clustering of IVs independently of the  
501 outcome or the individual MR causal effects of the IVs. By clustering based on the PheWAS data  
502 of the exposure IVs and various other traits, we can reveal possible pathways and mechanisms  
503 through which the exposure manifests, independently of any outcome.

504 Another comparable clustering method by Grant et al.<sup>[35]</sup> uses genetic variant associations with  
505 a set of traits to identify groups of IVs with similar biological mechanisms. Their method,  
506 NAvMix, uses a directional clustering algorithm and includes a noise-cluster to increase robust-  
507 ness to outliers. NAvMIX is demonstrated on BMI IVs and their associations to nine lifestyle  
508 or cardio-metabolic traits that have been previously shown to be related to BMI. Their results  
509 revealed 5 distinct clusters where they were able to identify a metabolically healthy obesity  
510 cluster that also had a small MR causal effect on coronary heart disease (CHD). However, we  
511 were unable to run their method using our data due to convergence issues arising when the  
512 number of traits used for PheWAS association increases. This comparison also highlights that  
513 the traits we include in the pheWAS analysis (and the subsequent clustering) have an impor-  
514 tant role in which biological mechanisms we can detect. For example, our analysis did not pick  
515 up the metabolically healthy obesity cluster, potentially because waist-to-hip ratio and other  
516 subcutaneous-vs-visceral fat proxy-traits were not included among the 408 selected phenotypes  
517 due to our filtering on genetic correlation with BMI ( $r^g < 0.75$ ). Without such filtering, PWC-  
518 MR reveals 5 clusters with significantly heterogeneous causal effects on EDU. These five clusters

519 are very similar to the original six, with the original cluster #1 getting diffused into the other  
520 clusters. Reassuringly, the cluster that is strongly enriched for SEP-related traits has a large  
521 negative causal effect estimate of -0.53 (95% CI: -0.59, -0.48), whereas the cluster that is most  
522 enriched for body-measurement/fat-mass traits still had an attenuated causal effect of -0.10  
523 (95% CI: -0.14, -0.06).

524 Furthermore, we attempted to consolidate our findings of the k-means clustering and enrichment  
525 analysis by running a genetic colocalisation analysis on the 324 clustered BMI IVs and both  
526 subcutaneous adipose and brain tissue. Unfortunately, we do not find an association between  
527 the cluster memberships of the IVs and their signal colocalization in brain or adipose tissue,  
528 possibly due to the limited evidence of colocalization in either tissue for most loci.

529 Our method has its own set of limitations: first, we are limited by the availability of traits with  
530 PheWAS data to support our informative clustering of IVs. This may lead to a failure in identi-  
531 fying key pathways and thus missing clusters representing important subgroup (mediator/sub-  
532 phenotype/confounder). Second, although it is not the most ideal handling of data, our binary  
533 traits are treated as continuous ones in our analysis. In large samples, linear and logistic re-  
534 gression effect estimates correlate very strongly and hence, it is likely that this choice did not  
535 impact the clustering<sup>[36]</sup>. Third, although we have attempted to minimise the arbitrary choice  
536 of parameters in our analysis, the genetic correlation threshold that determines which traits are  
537 too similar to the exposure and outcome trait is arbitrarily set at 0.75 for BMI and EDU and  
538 could be modified, but the emerging clusters may change as a consequence. Similarly, some  
539 p-value thresholds and type I error rate control was set at 5%, which may be viewed as ar-  
540 bitrary. Fourth, the identified potential confounder traits used in the MVMR analysis act as  
541 simple proxies for true confounders. For example, exposure to current tobacco smoking or TV  
542 watching can be highly (genetically) correlated to the same or a similar exposure during early  
543 life (or even proxy a parental trait), hence it is rather the earlier version of the exposure which  
544 is likely to be the true confounder. Our proxy confounders were simply nuisance variables, their  
545 only role was to see the remaining causal effect of BMI on EDU upon conditioning on them.  
546 Lastly, we acknowledge that there are several other tests<sup>[37]</sup> that could be used in place of a t-test  
547 when excluding SNPs more strongly associated to other traits than our exposure or different MR  
548 methods used in our systematic confounder search, however both of these were simple exclusion  
549 or pre-selection steps that have very little impact on the outcome of the results.

## 550 **Acknowledgements**

551 We are grateful for the useful discussions on MVMR with Eleanor Sanderson. This research  
552 has been conducted using the UK Biobank Resource under Application Number 16389. Z.K.  
553 was funded by the Swiss National Science Foundation (310030\_189147 and 32003B\_173092). GH  
554 and GDS work within the MRC Integrative Epidemiology Unit at the University of Bristol  
555 (MC\_UU\_00011/1). Payments were made to the institution. For computations, we used the  
556 CHUV HPC cluster.

## 557 **Author contributions**

558 L.D. and Z.K. conceived and designed the project. Z.K. supervised all statistical analyses. L.D.  
559 implemented the research and performed the analyses. L.D. and Z.K. prepared the first draft  
560 of the manuscript. L.D., Z.K., G.H. and G.D.S. contributed to the review and editing of the  
561 manuscript.

## 562 **Competing interests**

563 The authors declare no competing interests.

## 564 **Code availability**

565 The source code for this work can be found on <https://github.com/LizaDarrous/PheWAS-cluster>.

## 566 References

- 567 [1] Uffelmann, E., Huang, Q. Q., Munung, N. S., de Vries, J., Okada, Y., Martin, A. R., Martin,  
568 H. C., Lappalainen, T., and Posthuma, D. (2021). Genome-wide association studies. *Nature*  
569 *Reviews Methods Primers 1*, 59.
- 570 [2] Yengo, L., Vedantam, S., Marouli, E., Sidorenko, J., Bartell, E., Sakaue, S., Graff, M.,  
571 Eliassen, A. U., Jiang, Y., Raghavan, S., et al. (2022). A saturated map of common genetic  
572 variants associated with human height. *Nature 610*, 704–712.
- 573 [3] Lee, J. J., Wedow, R., Okbay, A., Kong, E., Maghzian, O., Zacher, M., Nguyen-Viet, T. A.,  
574 Bowers, P., Sidorenko, J., Karlsson Linnér, R., et al. (2018). Gene discovery and polygenic  
575 prediction from a genome-wide association study of educational attainment in 1.1 million  
576 individuals. *Nat Genet 50*, 1112–1121.
- 577 [4] Sanderson, E., Glymour, M. M., Holmes, M. V., Kang, H., Morrison, J., Munafò, M. R.,  
578 Palmer, T., Schooling, C. M., Wallace, C., Zhao, Q., et al. (2022). Mendelian randomization.  
579 *Nature Reviews Methods Primers 2*, 6.
- 580 [5] Davey Smith, G. and Hemani, G. (2014). Mendelian randomization: genetic anchors for  
581 causal inference in epidemiological studies. *Human Molecular Genetics 23*, R89–R98.
- 582 [6] Burgess, S., Butterworth, A., and Thompson, S. G. (2013). Mendelian randomization  
583 analysis with multiple genetic variants using summarized data. *Genet Epidemiol 37*, 658–  
584 665.
- 585 [7] Watanabe, K., Stringer, S., Frei, O., UmičevićMirkov, M., de Leeuw, C., Polderman, T.  
586 J. C., van der Sluis, S., Andreassen, O. A., Neale, B. M., and Posthuma, D. (2019). A  
587 global overview of pleiotropy and genetic architecture in complex traits. *Nature Genetics*  
588 *51*, 1339–1348.
- 589 [8] Bowden, J., Davey Smith, G., and Burgess, S. (2015). Mendelian randomization with  
590 invalid instruments: effect estimation and bias detection through egger regression. *Int J*  
591 *Epidemiol 44*, 512–525.
- 592 [9] Morrison, J., Knoblauch, N., Marcus, J. H., Stephens, M., and He, X. (2020). Mendelian  
593 randomization accounting for correlated and uncorrelated pleiotropic effects using genome-  
594 wide summary statistics. *Nat Genet 52*, 740–747.
- 595 [10] Darrous, L., Mounier, N., and Kutalik, Z. (2021). Simultaneous estimation of bi-directional  
596 causal effects and heritable confounding from gwas summary statistics. *Nature Communi-*  
597 *cations 12*, 7274.
- 598 [11] Young, A. I., Benonisdottir, S., Przeworski, M., and Kong, A. (2019). Deconstructing the  
599 sources of genotype-phenotype associations in humans. *Science 365*, 1396–1400.
- 600 [12] Robinson, M. R., Kleinman, A., Graff, M., Vinkhuyzen, A. A. E., Couper, D., Miller, M. B.,  
601 Peyrot, W. J., Abdellaoui, A., Zietsch, B. P., Nolte, I. M., et al. (2017). Genetic evidence  
602 of assortative mating in humans. *Nature Human Behaviour 1*, 0016.
- 603 [13] Howe, L. J., Lawson, D. J., Davies, N. M., St. Pourcain, B., Lewis, S. J., Davey Smith, G.,  
604 and Hemani, G. (2019). Genetic evidence for assortative mating on alcohol consumption  
605 in the uk biobank. *Nature Communications 10*, 5039.
- 606 [14] Haworth, S., Mitchell, R., Corbin, L., Wade, K. H., Dudding, T., Budu-Aggrey, A.,  
607 Carslake, D., Hemani, G., Paternoster, L., Davey Smith, G., et al. (2019). Apparent latent

- 608 structure within the uk biobank sample has implications for epidemiological analysis. *Nat*  
609 *Commun* *10*, 333.
- 610 [15] Davies, N. M., Howe, L. J., Brumpton, B., Havdahl, A., Evans, D. M., and Davey Smith, G.  
611 (2019). Within family mendelian randomization studies. *Hum Mol Genet* *28*, R170–R179.
- 612 [16] Benyamin, B., Visscher, P. M., and McRae, A. F. (2009). Family-based genome-wide  
613 association studies. *Pharmacogenomics* *10*, 181–190.
- 614 [17] Brumpton, B., Sanderson, E., Heilbron, K., Hartwig, F. P., Harrison, S., Vie, G. Å., Cho,  
615 Y., Howe, L. D., Hughes, A., Boomsma, D. I., et al. (2020). Avoiding dynastic, assortative  
616 mating, and population stratification biases in mendelian randomization through within-  
617 family analyses. *Nature Communications* *11*, 3519.
- 618 [18] Howe, L. J., Nivard, M. G., Morris, T. T., Hansen, A. F., Rasheed, H., Cho, Y., Chittoor,  
619 G., Ahlskog, R., Lind, P. A., Palviainen, T., et al. (2022). Within-sibship genome-wide  
620 association analyses decrease bias in estimates of direct genetic effects. *Nature Genetics* *54*,  
621 581–592.
- 622 [19] Neale Lab (2018). UK BioBank - round 2. <http://www.nealelab.is/uk-biobank/>.
- 623 [20] Hemani, G., Zheng, J., Elsworth, B., Wade, K., Baird, D., Haberland, V., Laurin, C.,  
624 Burgess, S., Bowden, J., Langdon, R., et al. (2018). The mr-base platform supports  
625 systematic causal inference across the human phenome. *eLife* *7*, e34408.
- 626 [21] Hemani, G., Tilling, K., and Davey Smith, G. (2017). Orienting the causal relationship  
627 between imprecisely measured traits using gwas summary data. *PLOS Genetics* *13*, 1–22.
- 628 [22] Hartigan, J. A. and Wong, M. A. (1979). Algorithm as 136: A k-means clustering algorithm.  
629 *Journal of the Royal Statistical Society. Series C (Applied Statistics)* *28*, 100–108.
- 630 [23] Mounier, N. and Kutalik, Z. (2022). Bias correction for inverse variance weighting mendelian  
631 randomization. *bioRxiv*.
- 632 [24] Bowden, J., Del Greco M, F., Minelli, C., Davey Smith, G., Sheehan, N., and Thompson,  
633 J. (2017). A framework for the investigation of pleiotropy in two-sample summary data  
634 mendelian randomization. *Stat Med* *36*, 1783–1802.
- 635 [25] Mounier, N. and Kutalik, Z. (2020). bGWAS: an R package to perform Bayesian genome  
636 wide association studies. *Bioinformatics* *36*, 4374–4376.
- 637 [26] Sanderson, E., Spiller, W., and Bowden, J. (2021). Testing and correcting for weak and  
638 pleiotropic instruments in two-sample multivariable mendelian randomization. *Statistics in*  
639 *Medicine* *40*, 5434–5452.
- 640 [27] Foley, C. N., Mason, A. M., Kirk, P. D. W., and Burgess, S. (2020). MR-Clust: clustering of  
641 genetic variants in Mendelian randomization with similar causal estimates. *Bioinformatics*  
642 *37*, 531–541.
- 643 [28] Leyden, G. M., Shapland, C. Y., Davey Smith, G., Sanderson, E., Greenwood, M. P.,  
644 Murphy, D., and Richardson, T. G. (2022). Harnessing tissue-specific genetic variation to  
645 dissect putative causal pathways between body mass index and cardiometabolic phenotypes.  
646 *The American Journal of Human Genetics* *109*, 240–252.
- 647 [29] Giambartolomei, C., Vukcevic, D., Schadt, E. E., Franke, L., Hingorani, A. D., Wallace, C.,  
648 and Plagnol, V. (2014). Bayesian test for colocalisation between pairs of genetic association  
649 studies using summary statistics. *PLoS Genet* *10*, e1004383.

- 650 [30] Richardson, T. G., Sanderson, E., Elsworth, B., Tilling, K., and Davey Smith, G. (2020).  
651 Use of genetic variation to separate the effects of early and later life adiposity on disease  
652 risk: mendelian randomisation study. *BMJ* *369*.
- 653 [31] Brandkvist, M., Bjørngaard, J. H., Ødegård, R. A., Åsvold, B. O., Davey Smith, G.,  
654 Brumpton, B., Hveem, K., Richardson, T. G., and Vie, G. Å. (2020). Separating the  
655 genetics of childhood and adult obesity: a validation study of genetic scores for body mass  
656 index in adolescence and adulthood in the HUNT Study. *Human Molecular Genetics* *29*,  
657 3966–3973.
- 658 [32] Alves, A. C., Silva, N. M. G. D., Karhunen, V., Sovio, U., Das, S., Taal, H. R., Warrington,  
659 N. M., Lewin, A. M., Kaakinen, M., Cousminer, D. L., et al. (2019). Gwas on longitudi-  
660 nal growth traits reveals different genetic factors influencing infant, child, and adult bmi.  
661 *Science Advances* *5*, eaaw3095.
- 662 [33] Richardson, T. G., Power, G. M., and Davey Smith, G. (2022). Adiposity may confound  
663 the association between vitamin d and disease risk - a lifecourse mendelian randomization  
664 study. *Elife* *11*.
- 665 [34] Blane, D., Hart, C. L., Davey Smith, G., Gillis, C. R., Hole, D. J., and Hawthorne, V. M.  
666 (1996). Association of cardiovascular disease risk factors with socioeconomic position during  
667 childhood and during adulthood. *BMJ* *313*, 1434–1438.
- 668 [35] Grant, A. J., Gill, D., Kirk, P. D. W., and Burgess, S. (2022). Noise-augmented directional  
669 clustering of genetic association data identifies distinct mechanisms underlying obesity.  
670 *PLOS Genetics* *18*, 1–24.
- 671 [36] Pedersen, E. M., Agerbo, E., Plana-Ripoll, O., Steinbach, J., Krebs, M. D., Hougaard,  
672 D. M., Werge, T., Nordentoft, M., Børghlum, A. D., Musliner, K. L., et al. (2022). Adult:  
673 An efficient and robust time-to-event gwas. medRxiv.
- 674 [37] Brown, B. C. and Knowles, D. A. (2021). Welch-weighted egger regression reduces false  
675 positives due to correlated pleiotropy in mendelian randomization. *Am J Hum Genet* *108*,  
676 2319–2335.



677

## Supplementary Information

### 678 Supplementary Figures

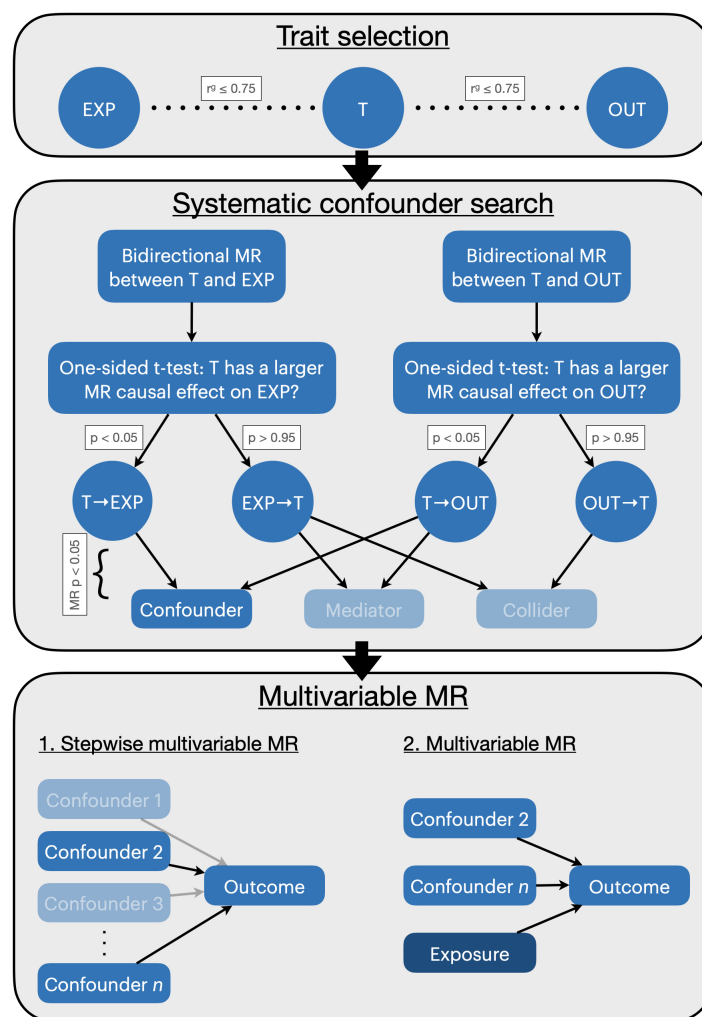

**Figure S1:** Flow diagram representing a complimentary approach to PWC-MR where a systematic candidate confounder trait search is performed. These candidate confounder traits are defined as having an effect on both the exposure and the outcome. In the third step, a stepwise multivariable MR of the candidate confounder traits is performed to select those with a strong effect on the outcome. They are then added with the original exposure to a standard MVMR and the multivariable causal effect on the outcome is estimated. Acronyms: EXP - exposure, OUT - outcome, T - trait, p: t-test p-value; MR P: MR p-value

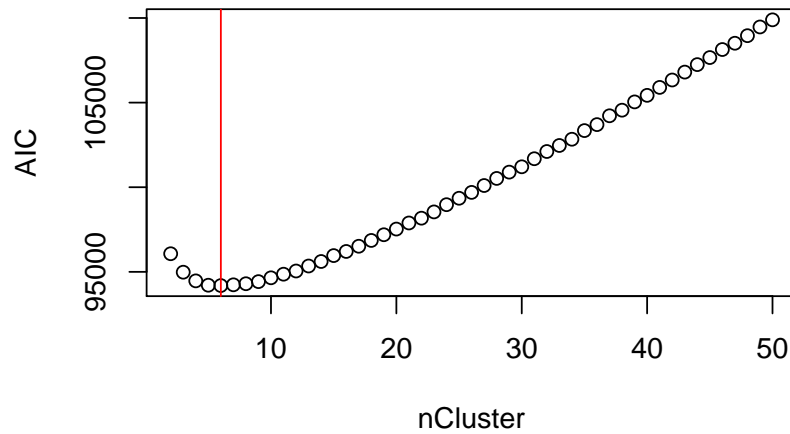

**Figure S2:** Dot plot representing the corresponding Akaike Information Criterion scores across varying K-means centres for BMI. K-means centres vary from 2 to 50 clusters. The red vertical line represents the number of centres/cluster with the lowest score.

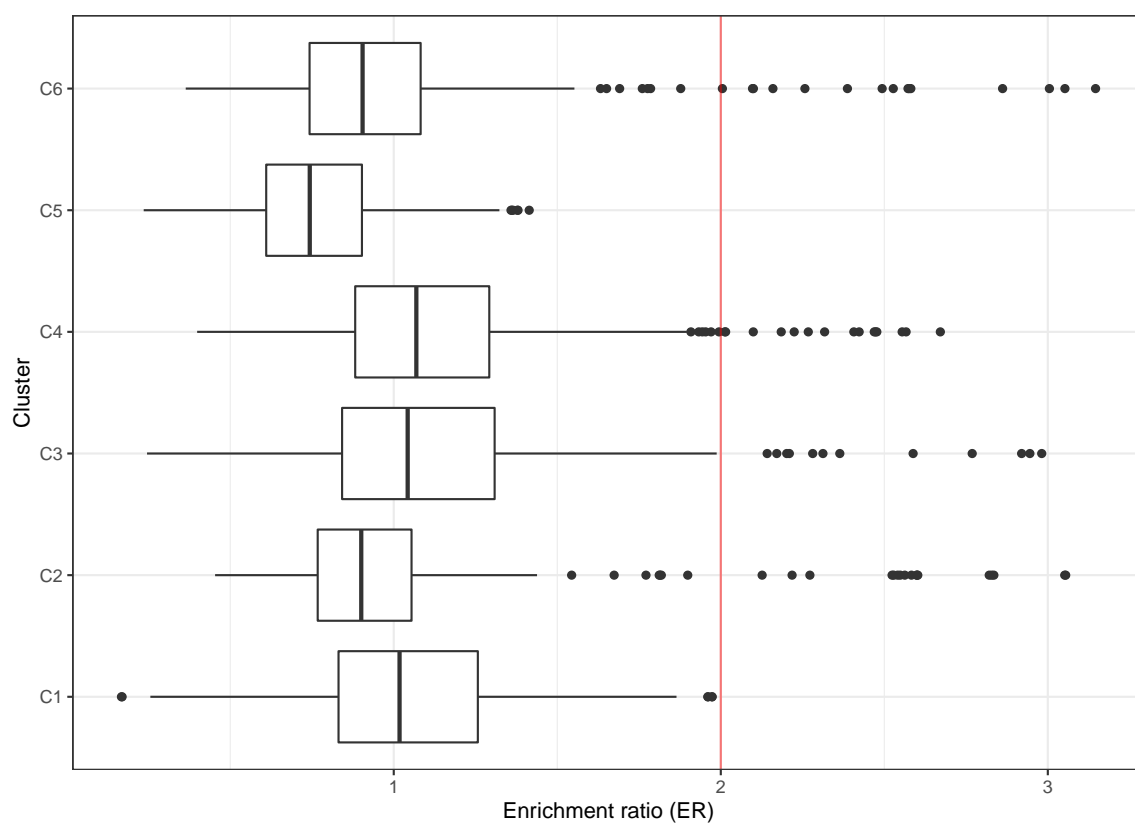

**Figure S3:** Boxplot showing the enrichment ratio of all traits in each cluster. BMI IVs have been clustered into 6 clusters using K-means. The enrichment ratio of each trait calculated using the cluster-specific IVs is shown in the barplot. In the boxplots, the lower and upper hinges correspond to the first and third quartiles, the middle bar corresponds to the median, whereas the upper whisker is the largest data point smaller than  $1.5 \times$  inter-quartile range above the third quartile. The lower whisker is defined analogously.

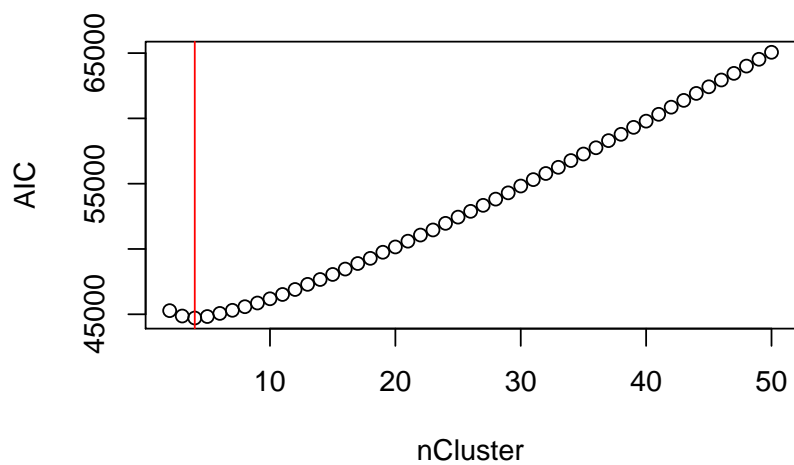

**Figure S4:** Dot plot representing the corresponding Akaike Information Criterion scores across varying K-means centres for child BMI. K-means centres vary from 2 to 50 clusters. The red vertical line represents the number of centres/cluster with the lowest score.

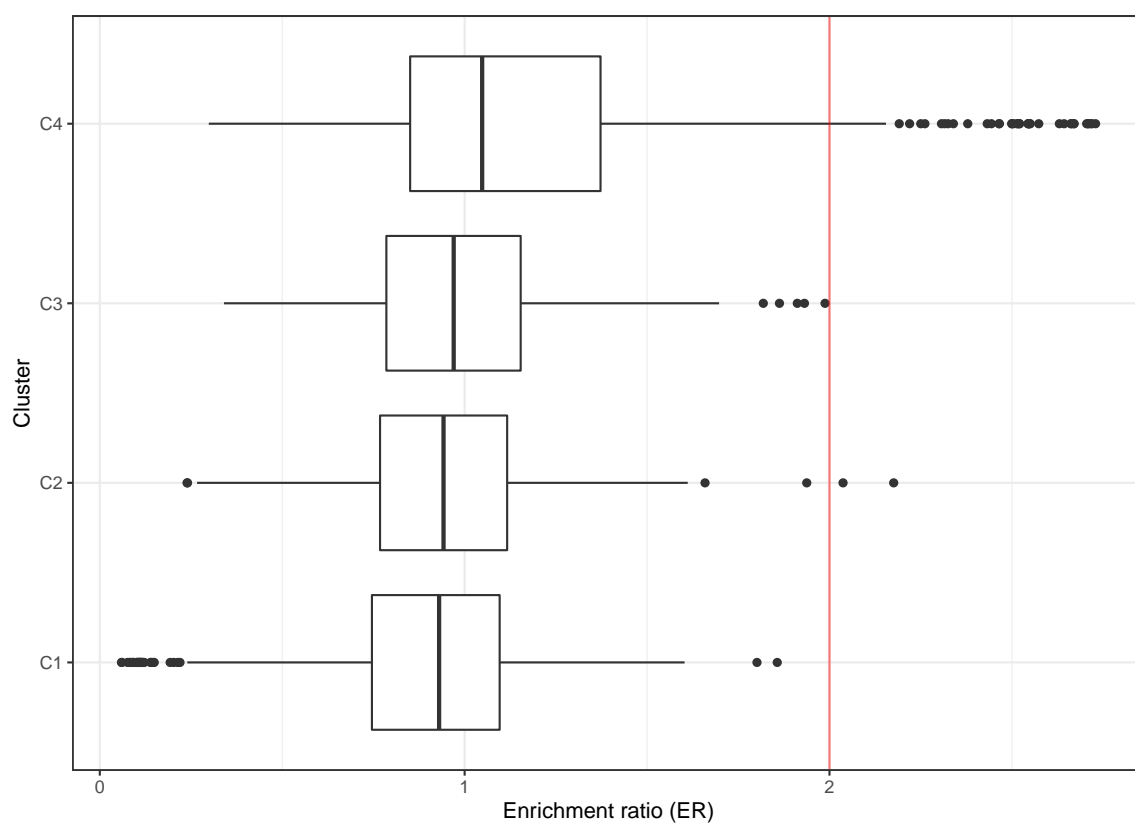

**Figure S5: Boxplot showing the enrichment ratio of all traits in each cluster.** Child BMI IVs have been clustered into 4 clusters using K-means. The enrichment ratio of each trait calculated using the cluster-specific IVs is shown in the barplot. In the boxplots, the lower and upper hinges correspond to the first and third quartiles, the middle bar corresponds to the median, whereas the upper whisker is the largest data point smaller than  $1.5 \times$  inter-quartile range above the third quartile. The lower whisker is defined analogously.

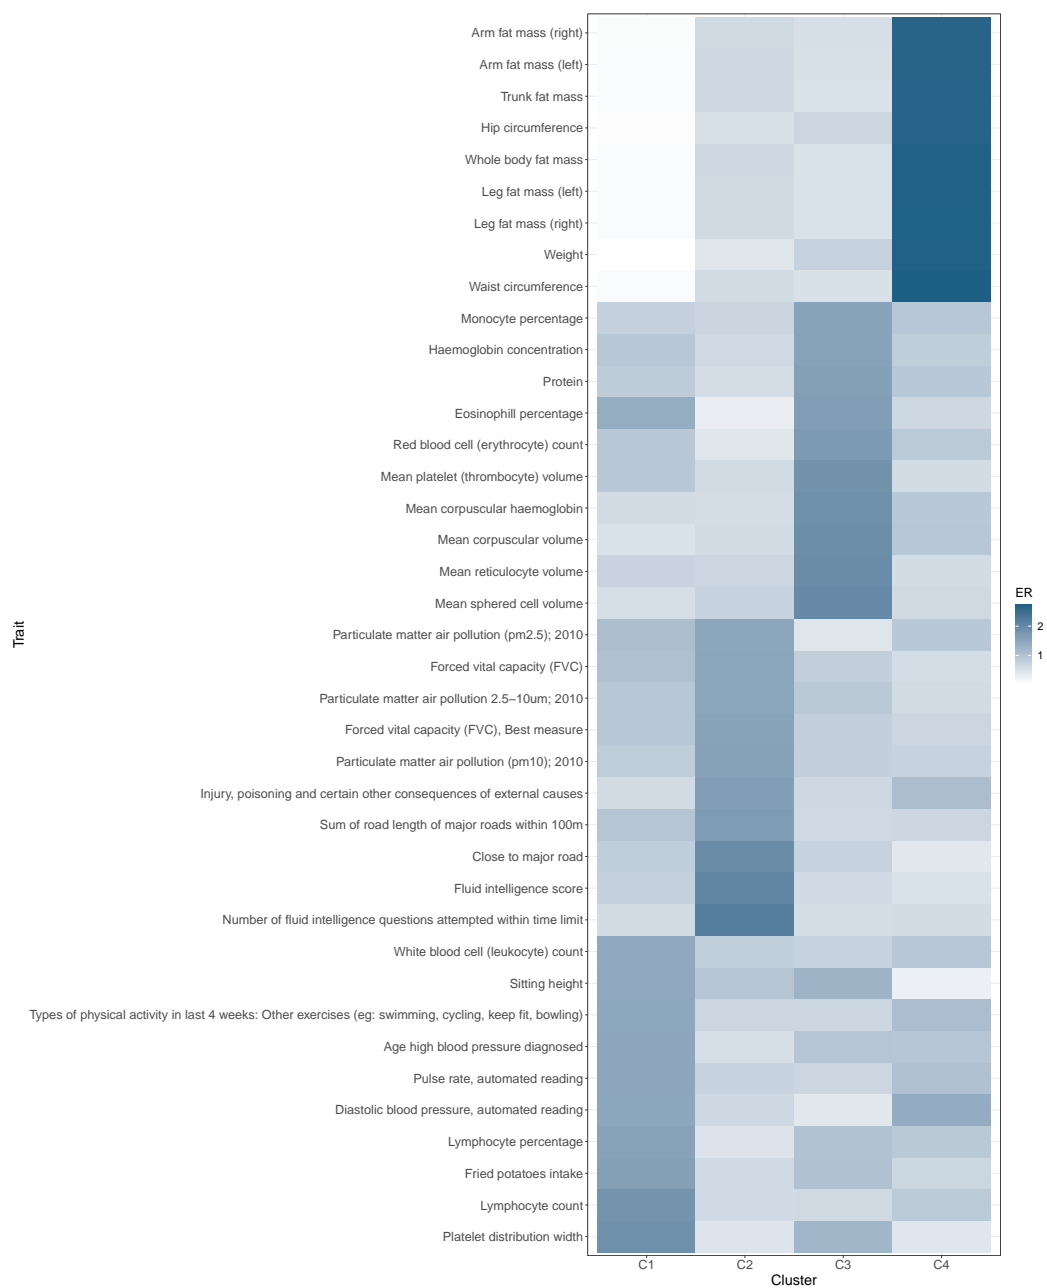

**Figure S6: Heatmap of the enrichment ratio of the top 10 traits in each cluster.** Body size at age 10 is used as a proxy exposure trait for child BMI. K-means clustering revealed 4 clusters with the following trait enrichment ratios.



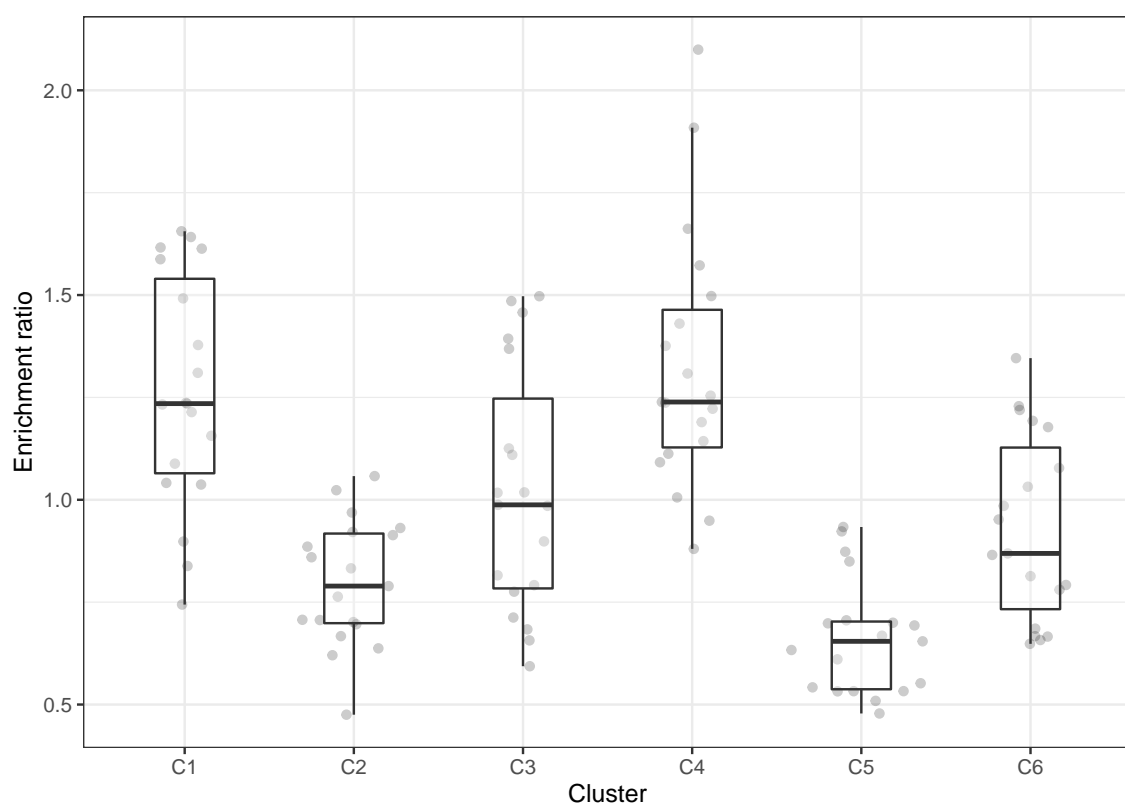

**Figure S7:** Boxplot showing the ER for confounder traits across the clusters. Confounder traits were categorised in a systematic search. In the boxplots, the lower and upper hinges correspond to the first and third quartiles, the middle bar corresponds to the median, whereas the upper whisker is the largest data point smaller than 1.5\* inter-quartile range above the third quartile. The lower whisker is defined analogously.

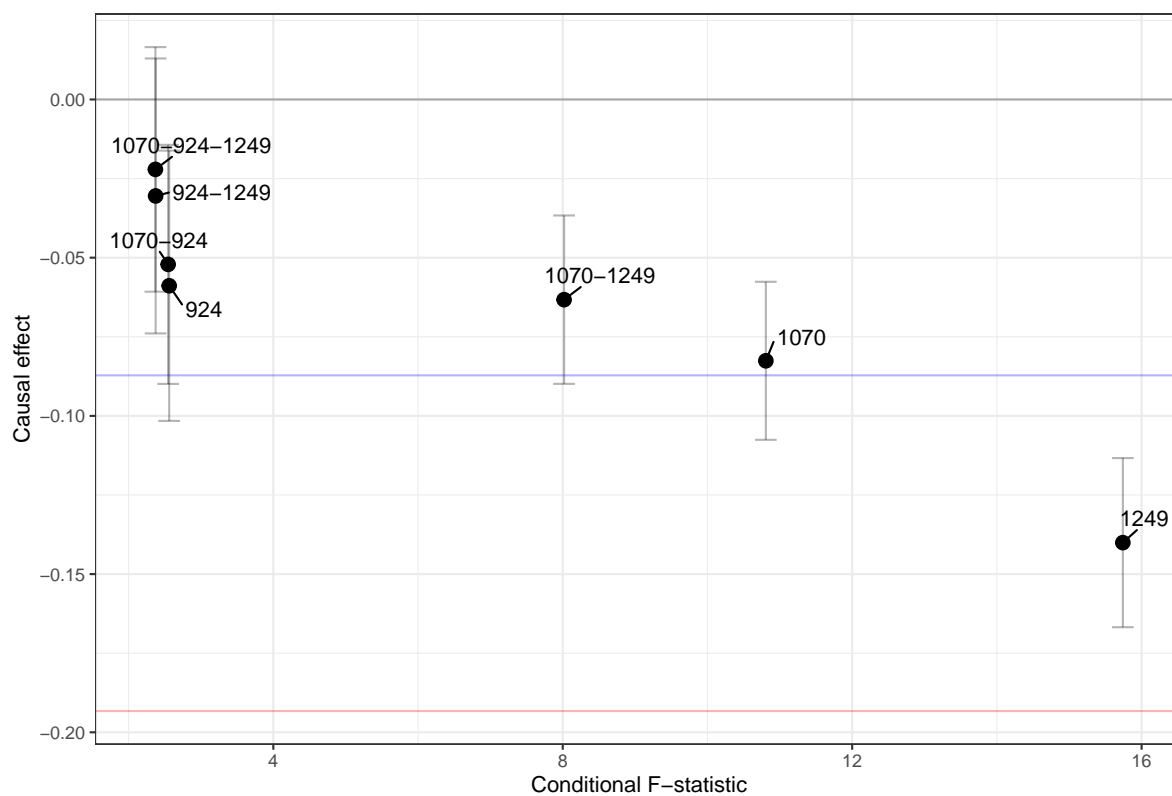

**Figure S8:** Dot plot showing the causal effect estimate of BMI on EDU conditional on various combinations of three candidate confounder traits. The error bars represent the 95% CI. The blue horizontal line represents the observational correlation between BMI and EDU, whereas the red horizontal line represents the univariate causal effect estimate of BMI on EDU. Trait 1070: ‘Time spent watching television (TV)’, trait 924: ‘Usual walking pace’, trait 1249: ‘Past tobacco smoking’.

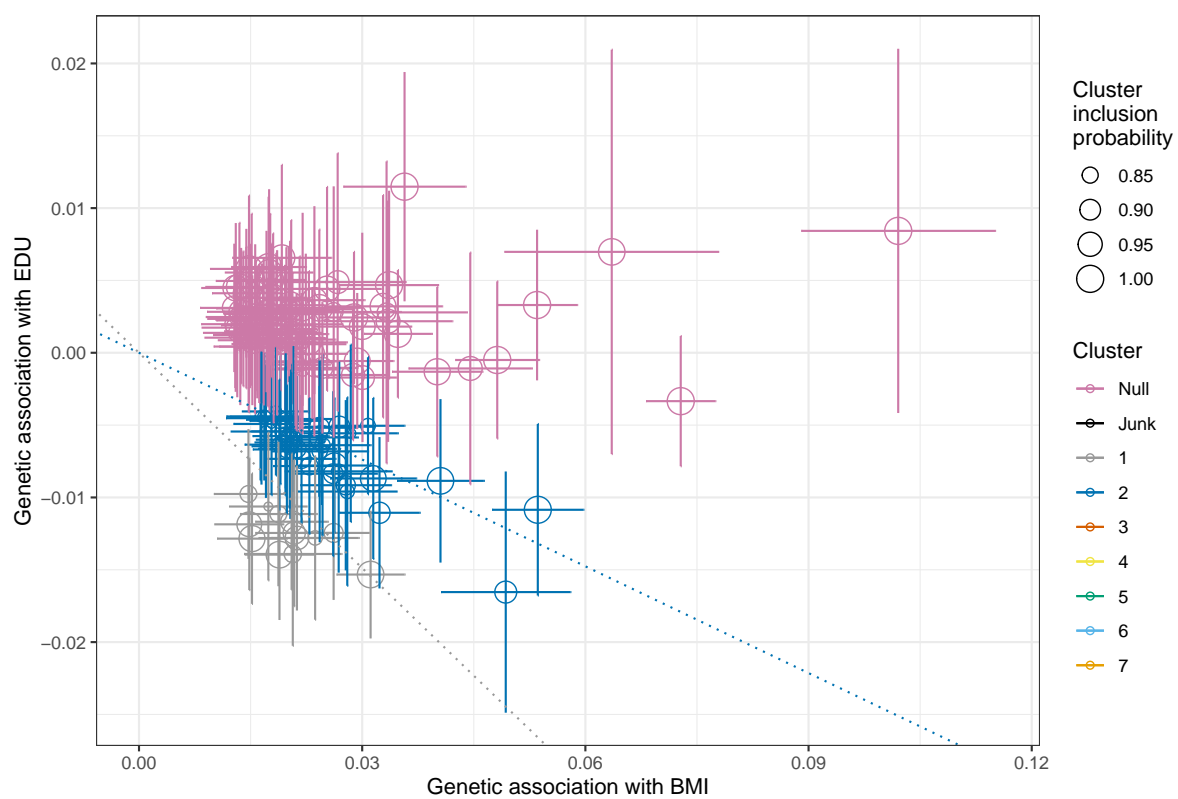

**Figure S9:** Dot plot showing the genetic association of IVs with the exposure: BMI, and the outcome: EDU. The exposure IVs have been clustered using MR-Clust based on their similarity in causal effect estimates. MR-Clust has revealed 2 main clusters for BMI's causal effect on EDU as well as a 'null' cluster. The IVs plotted have a cluster inclusion probability greater than or equal to 80%. The slopes represent the causal effect estimate of each cluster.
